# Supplementary material for: The Effectiveness of a Balanced Salt Solution on Dry Eyes in Comatose Patients: A Randomized Trial
Source: Research Square preprint supplement (doi:10.21203/rs.3.rs-362851/v1), 2021-03-31
Supplement: Supplementary file 1 [file 7e8b12a31c9eb32a7fd15407.docx]

Analysis

Eye care with BSS

Assessed for eligibility=39

Eye Care With Artificial Tear

Excluded=5

Death (n=3)

Increase level of consciousness (n=2)

Follow up (n=34)
